# Supplementary material for: Nutritional, Cardiovascular Health and Lifestyle Status of ‘Health Conscious’ Adult Vegans and Non-Vegans from Slovenia: A Cross-Sectional Self-Reported Survey
Source: MDPI journal article supplement (doi:10.3390/ijerph18115968), 2021-06-02
Supplement: s1 [file s1]

**Table S1.** Sociodemographic and other characteristics of participants.

| Parameter                           | Vegans<br>(n = 51) | Non-vegans<br>(n = 29) | <i>p</i> -value |
|-------------------------------------|--------------------|------------------------|-----------------|
|                                     | <i>n</i> (%)       | <i>n</i> (%)           |                 |
| <i>Partner status</i>               |                    |                        | 0.362           |
| Married                             | 17 (33)            | 15 (52)                |                 |
| Extramartial                        | 21 (41)            | 10 (34)                |                 |
| Single                              | 9 (18)             | 2 (7)                  |                 |
| Divorced                            | 4 (8)              | 2 (7)                  |                 |
| <i>Living environment</i>           |                    |                        | 0.209           |
| City                                | 16 (31)            | 5 (17)                 |                 |
| Suburban                            | 20 (39)            | 10 (34)                |                 |
| Rural                               | 15 (29)            | 14 (48)                |                 |
| <i>Education</i>                    |                    |                        | 0.073           |
| Primary /High School                | 19 (37)            | 15 (52)                |                 |
| College                             | 2 (4)              | 2 (7)                  |                 |
| Bachelor/university degree          | 26 (51)            | 11 (38)                |                 |
| Masters/PhD degree                  | 4 (8)              | 1 (3)                  |                 |
| <i>Employment status</i>            |                    |                        | 0.351           |
| Employed/helping in family business | 29 (57)            | 18 (62)                |                 |
| Self-employed/contract              | 11 (22)            | 7 (24)                 |                 |
| Retired                             | 0                  | 2 (7)                  |                 |
| High-school/student                 | 6 (12)             | 1 (3)                  |                 |
| Unemployed                          | 4 (8)              | 1 (3)                  |                 |
| <i>Income (€)</i>                   |                    |                        | 0.230           |
| ≤ 501                               | 1 (2)              | 2 (7)                  |                 |
| 501–900                             | 6 (12)             | 0                      |                 |
| 901–1300                            | 6 (12)             | 7 (24)                 |                 |
| 1301–1700                           | 12 (23)            | 5 (17)                 |                 |
| 1701–2100                           | 8 (16)             | 4 (14)                 |                 |
| ≥ 2101                              | 18 (35)            | 11 (38)                |                 |
| <i>Smoking</i>                      |                    |                        | 0.071           |
| Current                             | 2 (4)              | 4 (14)                 |                 |
| Former                              | 9 (18)             | 9 (31)                 |                 |
| Never                               | 40 (78)            | 16 (55)                |                 |

Chi square test was used; where expected frequency in a cell was less than 5, Fisher's exact test was used.

**Table S2.** Intakes of food groups in frequencies.

| Parameter                       | Vegans                        | Non-vegans |                   |
|---------------------------------|-------------------------------|------------|-------------------|
| Food groups                     | Intake frequency <sup>†</sup> |            | <i>p</i> - value  |
| <i>Liquid</i>                   |                               |            |                   |
| Water                           | 8.7 ± 0.9                     | 8.6 ± 1.2  | 0.578             |
| Coffee/tea                      | 6.8 ± 2.1                     | 6.5 ± 2.4  | 0.566             |
| Fruit/vegetable juice           | 2.4 ± 1.8                     | 2.6 ± 1.7  | 0.423             |
| Sport drinks                    | 2.2 ± 1.8                     | 1.9 ± 1.1  | 0.767             |
| Energy drinks                   | 1.1 ± 0.2                     | 1.2 ± 0.6  | 0.220             |
| Wine                            | 1.1 ± 0.7                     | 2.8 ± 1.7  | <b>&lt; 0.001</b> |
| Beer                            | 1.4 ± 0.6                     | 2.4 ± 1.8  | <b>0.005</b>      |
| Non-alcoholic beer              | 1.2 ± 0.4                     | 1.7 ± 1.1  | <b>0.031</b>      |
| Spirits                         | 1.4 ± 0.5                     | 1.9 ± 1.0  | <b>0.021</b>      |
| Enriched soy/cereal beverages   | 2.4 ± 2.3                     | 1.5 ± 1.1  | 0.089             |
| Unenriched soy/cereal beverages | 3.0 ± 2.1                     | 1.7 ± 1.6  | <b>0.003</b>      |
| <i>Animal-based foods</i>       |                               |            |                   |
| Yoghurt/cheese                  | 1.0 ± 0.8                     | 3.3 ± 2.0  | <b>&lt; 0.001</b> |
| Milk/chocolate milk             | 1.1 ± 0.4                     | 3.3 ± 2.0  | <b>&lt; 0.001</b> |
| Processed meat products         | 1.1 ± 0.5                     | 3.3 ± 2.2  | <b>&lt; 0.001</b> |
| Offal/liver/kidney              | 1.0 ± 0.2                     | 1.4 ± 0.6  | <b>&lt; 0.001</b> |
| Meat                            | 1.1 ± 0.6                     | 4.6 ± 1.6  | <b>&lt; 0.001</b> |
| Fish and products               | 1.1 ± 0.6                     | 2.7 ± 1.1  | <b>&lt; 0.001</b> |
| Eggs                            | 1.1 ± 0.5                     | 4.9 ± 1.5  | <b>&lt; 0.001</b> |
| Shellfish                       | 1.0 ± 0.3                     | 1.4 ± 0.8  | <b>0.013</b>      |
| Butter/lard                     | 1.1 ± 0.3                     | 2.5 ± 1.7  | <b>&lt; 0.001</b> |
| <i>Plant-based foods</i>        |                               |            |                   |
| Plant-based salads/humus        | 6.7 ± 2.0                     | 4.7 ± 2.2  | <b>&lt; 0.001</b> |
| Meat substitute/soya tofu       | 5.8 ± 1.6                     | 4.3 ± 1.8  | <b>&lt; 0.001</b> |
| Pasta                           | 4.5 ± 1.0                     | 4.5 ± 1.0  | 0.725             |
| Rise/other cereals              | 6.6 ± 1.1                     | 4.9 ± 0.8  | <b>0.005</b>      |
| White bread/products            | 1.9 ± 1.1                     | 3.0 ± 2.3  | 0.068             |
| Whole grain bread/products      | 6.9 ± 1.4                     | 5.5 ± 1.5  | <b>0.265</b>      |
| Baked potatoes                  | 4.1 ± 1.0                     | 3.8 ± 1.2  | 0.288             |
| Boiled/puree potatoes           | 4.4 ± 1.0                     | 3.9 ± 1.2  | 0.097             |
| Fried potatoes/croquettes       | 1.1 ± 0.3                     | 1.7 ± 1.1  | <b>&lt; 0.001</b> |
| Legumes                         | 8.1 ± 1.0                     | 4.7 ± 1.3  | <b>&lt; 0.001</b> |
| Raw vegetables                  | 7.9 ± 1.2                     | 6.4 ± 1.2  | <b>&lt; 0.001</b> |
| Boiled vegetables               | 7.0 ± 1.0                     | 6.1 ± 1.0  | <b>&lt; 0.001</b> |
| Fruits                          | 8.6 ± 1.2                     | 6.9 ± 1.0  | <b>&lt; 0.001</b> |
| Dry fruits                      | 3.8 ± 2.1                     | 3.5 ± 1.8  | 0.637             |
| Seeds                           | 7.4 ± 1.5                     | 5.2 ± 2.1  | <b>&lt; 0.001</b> |
| Nuts                            | 5.8 ± 1.7                     | 4.7 ± 1.6  | <b>0.011</b>      |
| <i>Sweets</i>                   |                               |            |                   |
| Chocolate/candy                 | 1.5 ± 1.4                     | 3.4 ± 1.8  | <b>0.016</b>      |
| Pastries                        | 2.3 ± 1.1                     | 2.9 ± 1.2  | <b>0.041</b>      |
| Confectionery/croissants/cakes  | 1.7 ± 1.0                     | 2.5 ± 1.1  | <b>&lt; 0.001</b> |
| <i>Others</i>                   |                               |            |                   |
| Ketchup                         | 1.7 ± 1.1                     | 1.7 ± 1.1  | 0.927             |
| Margarine                       | 1.0 ± 0.0                     | 1.3 ± 0.9  | <b>0.007</b>      |
| Dressings                       | 1.1 ± 0.3                     | 1.5 ± 0.9  | <b>0.023</b>      |

Data are means ± SD. Statistically significant values are written bold. <sup>†</sup>A higher number means more often; 1 - never, 9 - more than 3 times per day. For all variables, Mann-Whitney U-tests were used.

**Table S3.** Transportation, everyday sitting, and PA of vegans and non-vegans.

| Parameter                             | L-IPAQ score |             | <i>p</i> - value |
|---------------------------------------|--------------|-------------|------------------|
|                                       | Vegans       | Non-vegans  |                  |
| Transportation (min/day) <sup>†</sup> | 19 ± 15      | 22 ± 36     | 0.269            |
| Weekly sitting (h/day)                | 5.4 ± 2.6    | 4.2 ± 3.2   | 0.063            |
| Weekend sitting (h/day)               | 3.6 ± 1.9    | 4.9 ± 5.8   | 0.159*           |
| Walking PA (MET min/week)             | 2045 ± 2500  | 2547 ± 2871 | 0.172            |
| Moderate-intensity PA (MET min/week)  | 2120 ± 1400  | 3200 ± 1680 | <b>0.045</b>     |
| Vigorous-intensity PA (MET min/week)  | 2160 ± 800   | 2400 ± 1056 | 0.324            |
| Total (MET min/week) score            | 6325 ± 4870  | 8147 ± 4392 | 0.192            |

Data are means ± SD. Statistically significant values are written in bold. <sup>†</sup>Transport related to arrival and departure to work (i.e., with car, a train, by bus, using bicycle or by walking). \*A t-test was used; for other variables, Mann-Whitney U-tests were used.

**Table S4.** Sleep quality and patterns of vegans and non-vegans.

| Parameter                         | PSQI score               |            | <i>p</i> -value |
|-----------------------------------|--------------------------|------------|-----------------|
|                                   | Vegans                   | Non-vegans |                 |
| <i>Component 1</i>                | Subjective sleep quality |            |                 |
|                                   | 0.6 ± 0.6                | 0.9 ± 0.6  | 0.147           |
| <i>Component 2</i>                | Sleep latency            |            |                 |
|                                   | 0.5 ± 0.8                | 0.5 ± 0.8  | 0.986           |
| <i>Component 3</i>                | Sleep duration           |            |                 |
|                                   | 0.7 ± 0.7                | 0.8 ± 0.7  | 0.621           |
| <i>Component 4</i>                | Sleep efficiency         |            |                 |
|                                   | 0.1 ± 0.4                | 0.0 ± 0.2  | 0.289           |
| <i>Component 5</i>                | Sleep disturbance        |            |                 |
|                                   | 0.9 ± 0.4                | 0.9 ± 0.4  | 0.785           |
| <i>Component 6</i>                | Sleep medication use     |            |                 |
|                                   | 0                        | 0.1 ± 0.6  | 0.185           |
| <i>Component 7</i>                | Daytime dysfunction      |            |                 |
|                                   | 0.3 ± 0.6                | 0.8 ± 1.0  | <b>0.009</b>    |
| Global sleep quality <sup>†</sup> | 3.2 ± 1.9                | 4.0 ± 2.3  | 0.139           |

Data are mean ± SD. <sup>†</sup>Sum of seven component scores (range: 0–21; ≤ 5 indicates good sleep quality, >5 indicates poor sleep quality). Statistically significant values are written in bold. For all variables, Mann-Whitney U-tests were used.

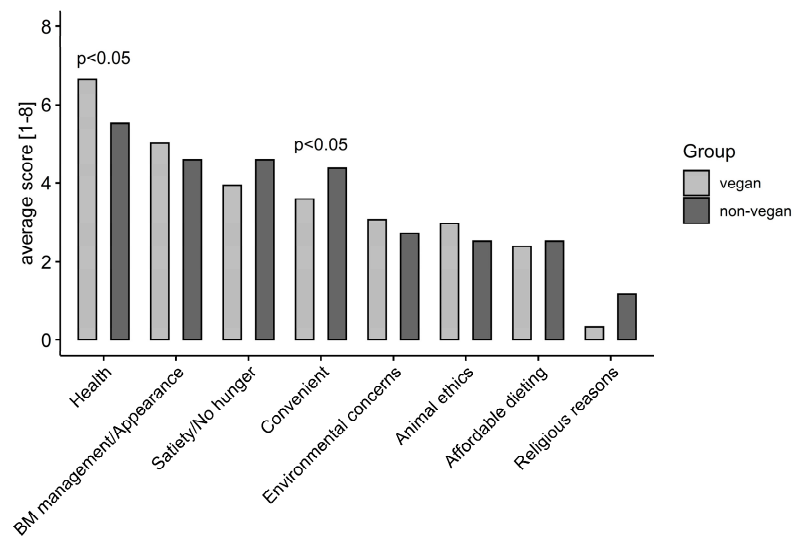

**Figure S1.** Motives of vegan and non-vegan for adopting dietary pattern.

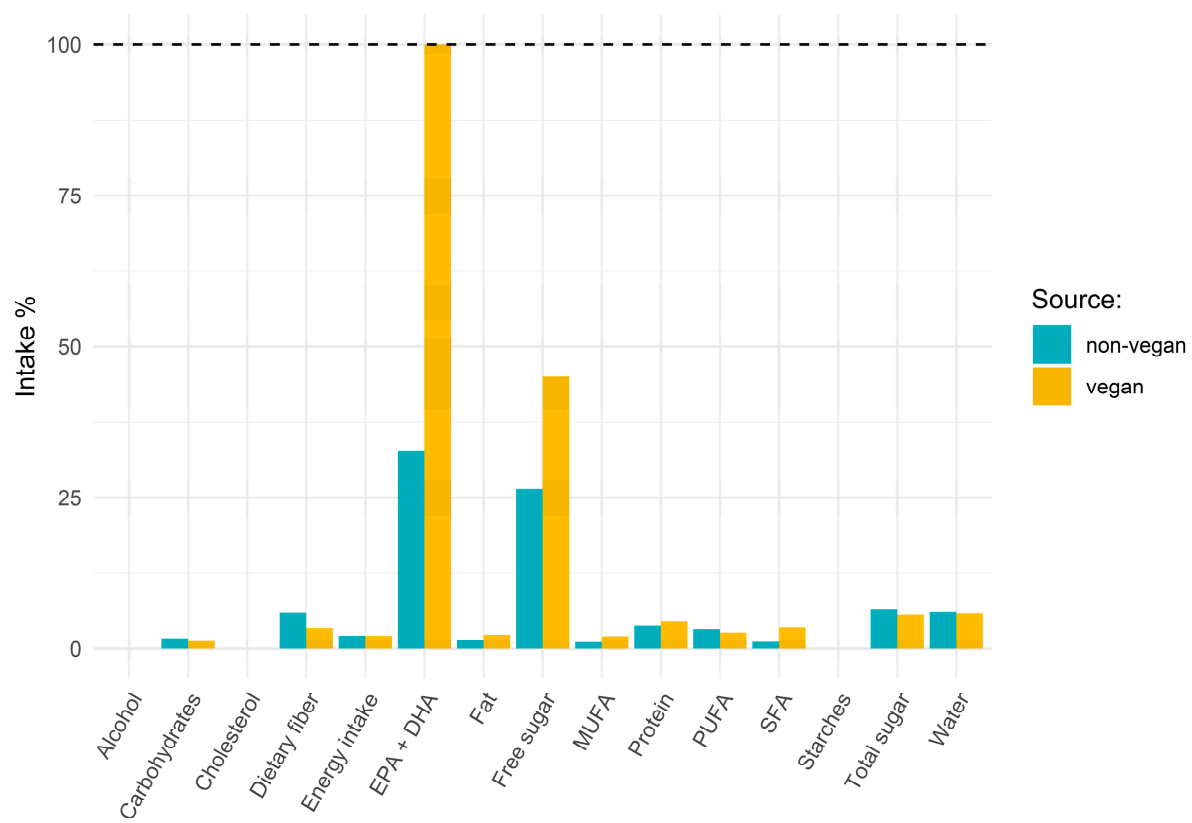

**Figure S2.** Proportion of macronutrients from supplementation.

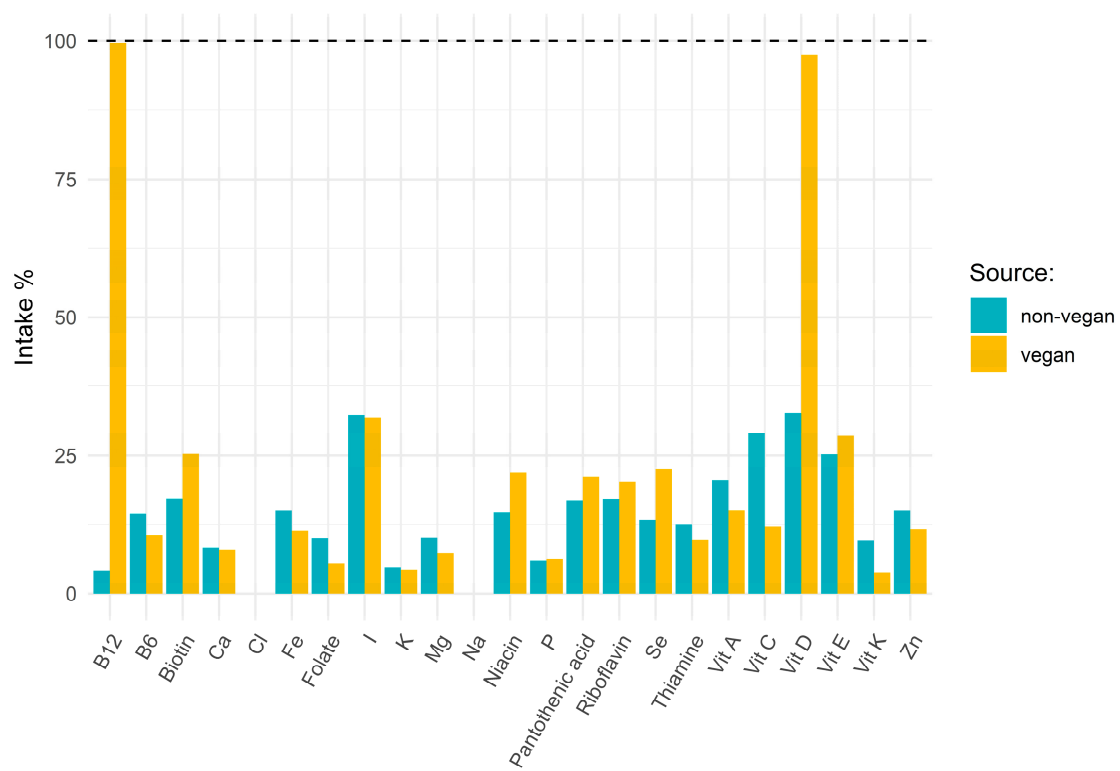

**Figure S3.** Proportion of micronutrients from supplementation.
